# Supplementary material
Source: PubMed Central journal article supplement (PMC6724736)
Supplement: NIHMS1530492-supplement-2.pdf [file NIHMS1530492-supplement-2.pdf]

**a**

| Study            | Subtype (# tumors sequenced)   | <i>PPP2R1A</i> mutations identified (# tumors affected)       | Tumors with co-occurring <i>PPP2R1A</i> mutations                                                                                                                                                                                        |
|------------------|--------------------------------|---------------------------------------------------------------|------------------------------------------------------------------------------------------------------------------------------------------------------------------------------------------------------------------------------------------|
| MSK-IMPACT       | Endometrioid (n=90)            | 1 P179 / 3 R183 / 0 S256 / 5 Other<br><b>9 Total</b> (n=7)    | P-0005564-T01-IM5: P130L, R183W<br>P-0004379-T01-IM5: R260H, D572G                                                                                                                                                                       |
| TCGA, Pan-Cancer | Endometrioid (n=388)           | 5 P179 / 5 R183 / 1 S256 / 40 Other<br><b>51 Total</b> (n=43) | TCGA-EY-A215-01: R48Q, L564P<br>TCGA-AP-A059-01 A114V, L173M, R183W<br>TCGA-D1-A167-01: R144C, R258C<br>TCGA-AX-A06F-01: R182W, A300V<br>TCGA-EY-A20Q-01: Q217R, R459H<br>TCGA-B5-A3FA-01: A264T, N360S<br>TCGA-B5-A1MR-01: D316G, D359Y |
| MSK-IMPACT       | Serous (n=46)                  | 12 P179 / 0 R183 / 3 S256 / 1 Other<br><b>16 Total</b> (n=16) | n/a                                                                                                                                                                                                                                      |
| TCGA, Pan-Cancer | Serous (n=108)                 | 21 P179 / 4 R183 / 9 S256 / 8 Other<br><b>42 Total</b> (n=40) | TCGA-AJ-A2QM-01: P179T, R459C<br>TCGA-DI-A2QY-01: E216K, D254E                                                                                                                                                                           |
| MSK-IMPACT       | Carcinosarcoma (n=36)          | 1 P179 / 0 R183 / 2 S256 / 3 Other<br><b>6 Total</b> (n=5)    | P-0002708-T01-IM3: A70V, X455_splice                                                                                                                                                                                                     |
| TCGA, Pan-Cancer | Carcinosarcoma (n=57)          | 5 P179 / 3 R183 / 2 S256 / 7 Other<br><b>17 Total</b> (n=16)  | TCGA-N5-A4RU-01: P179L, Q288H                                                                                                                                                                                                            |
| MSK-IMPACT       | Clear Cell (n=14)              | 0 P179 / 2 R183 / 0 S256 / 1 Other<br><b>3 Total</b> (n=3)    | n/a                                                                                                                                                                                                                                      |
| MSK-IMPACT       | Mixed, Undifferentiated (n=22) | 0 P179 / 1 R183 / 0 S256 / 2 Other<br><b>3 Total</b> (n=3)    | n/a                                                                                                                                                                                                                                      |
| TCGA, Pan-Cancer | Mixed (n=21)                   | 2 P179 / 1 R183 / 0 S256 / 2 Other<br><b>5 Total</b> (n=5)    | n/a                                                                                                                                                                                                                                      |

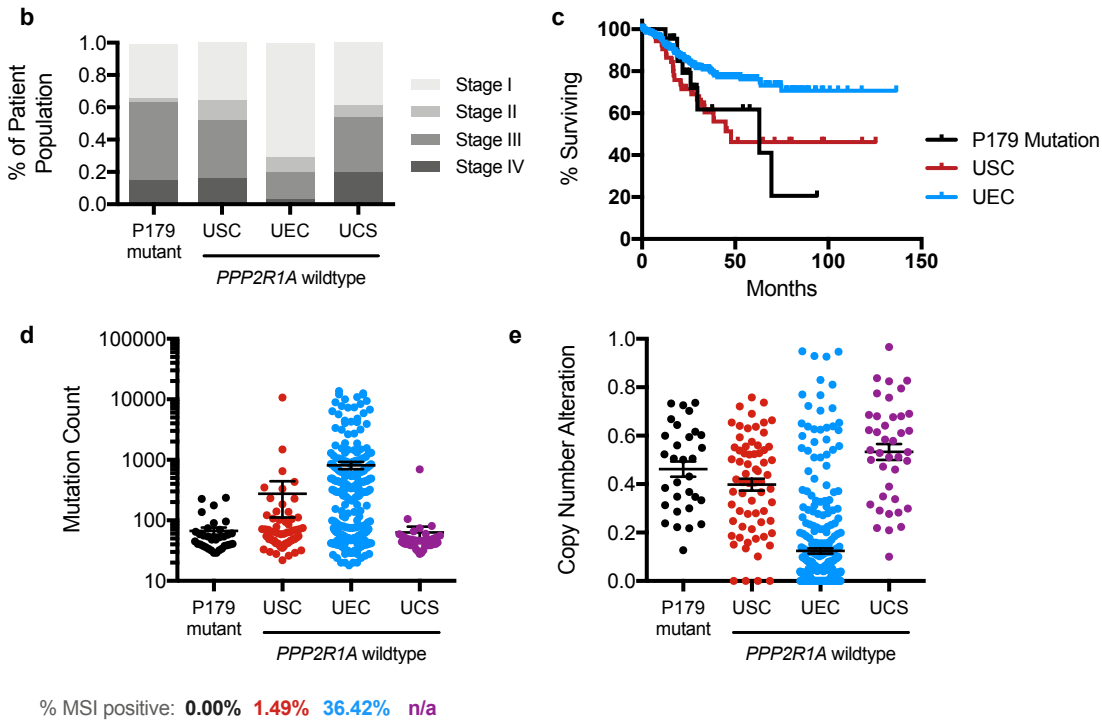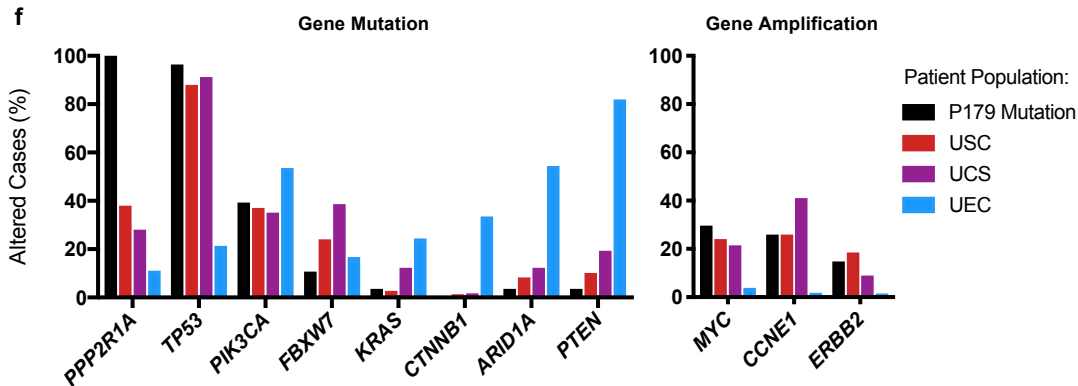

Supplemental Figure 1
