# Supplementary material
Source: PubMed Central journal article supplement (PMC6724736)
Supplement: NIHMS1530492-supplement-3.pdf [file NIHMS1530492-supplement-3.pdf]

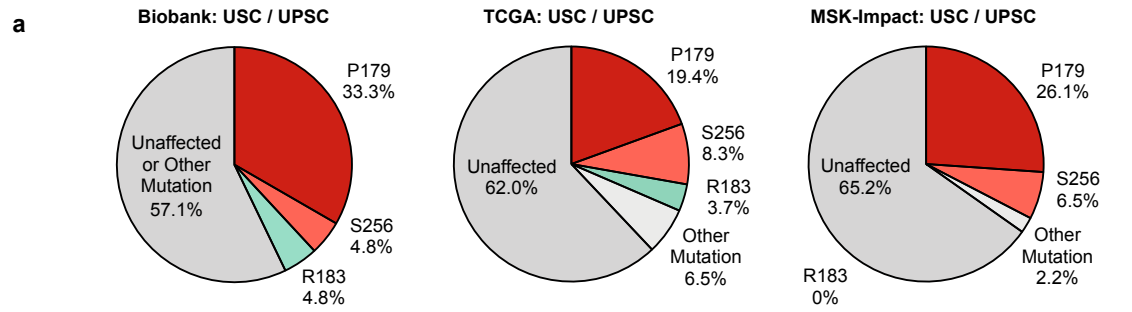

**b**

| Sample | Specimen             | Diagnosis                                                                  | DNA Sequence Change | Predicted Amino Acid Change  |
|--------|----------------------|----------------------------------------------------------------------------|---------------------|------------------------------|
| UT29   | Uterine tumor        | Stage IV, Grade 3, Carcinoma (subtype unknown)                             |                     |                              |
| UT42   | Ascites (recurrence) | Stage IIIC, Grade 3, Adenocarcinoma                                        |                     |                              |
| UT90   | Uterine tumor        | Stage IA, Grade 3, Papillary serous adenocarcinoma                         |                     |                              |
| UT209  | Uterine tumor        | Stage IB, Grade 3, Serous adenocarcinoma                                   | c.536C>G (CGC)      | p.Pro179Arg ( <b>P179R</b> ) |
| UT244  | Colon nodule         | Stage IV, Grade 3, Serous adenocarcinoma                                   |                     |                              |
| UT265  | Peritoneal biopsy    | Stage IV, Serous adenocarcinoma                                            |                     |                              |
| UT280  | Small bowel nodule   | Stage IV, Serous adenocarcinoma                                            |                     |                              |
| UT283  | Uterine tumor        | Stage IB, Serous adenocarcinoma                                            |                     |                              |
| UT60   | Uterine tumor        | Stage IA, Grade 2, Mixed Clear Cell, Mucinous, Endometrioid adenocarcinoma | c.536C>T (CTC)      | p.Pro179Lys ( <b>P179L</b> ) |
| UT199  | Uterine tumor        | Stage II, Grade 3, Mixed Serous, Endometrioid adenocarcinoma               | c.536C>A (CAC)      | p.Pro179His ( <b>P179H</b> ) |
| U125   | Uterine tumor        | Stage IA, Grade 3, Serous adenocarcinoma                                   | c.547C>T (TGG)      | p.Arg183Trp ( <b>R183W</b> ) |
| OV269  | Adnexal tumor        | Stage IC, Grade 3, Endometrioid OVCA                                       |                     |                              |
| UT49   | Uterine tumor        | Stage IA, Endometrioid adenocarcinoma                                      |                     |                              |
| UT72   | Uterine tumor        | Stage IA, Grade 3, Endometrioid adenocarcinoma                             | c.767C>T (TTC)      | p.Ser256Phe ( <b>S256F</b> ) |
| UT172  | Uterine tumor        | Stage II, Grade 3, Serous adenocarcinoma                                   |                     |                              |

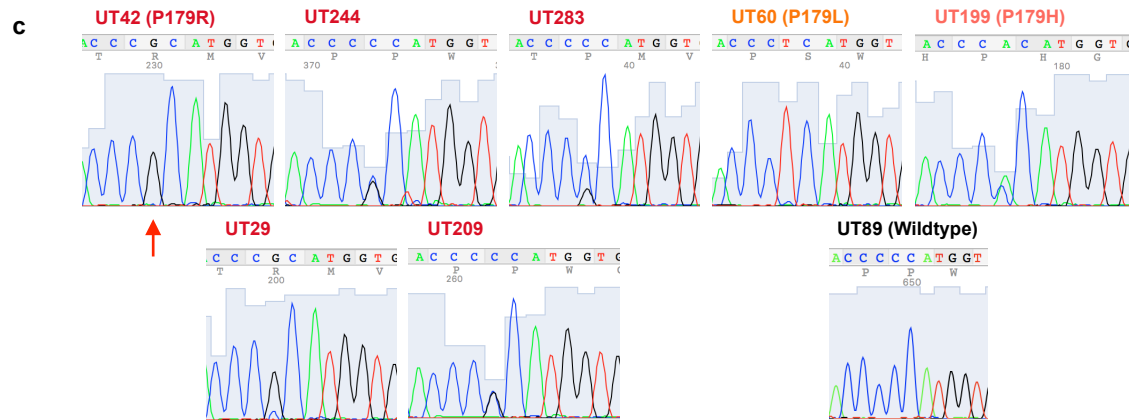

**Supplemental Figure 2**
