# Supplementary material
Source: PubMed Central journal article supplement (PMC6724736)
Supplement: NIHMS1530492-supplement-7.pdf [file NIHMS1530492-supplement-7.pdf]

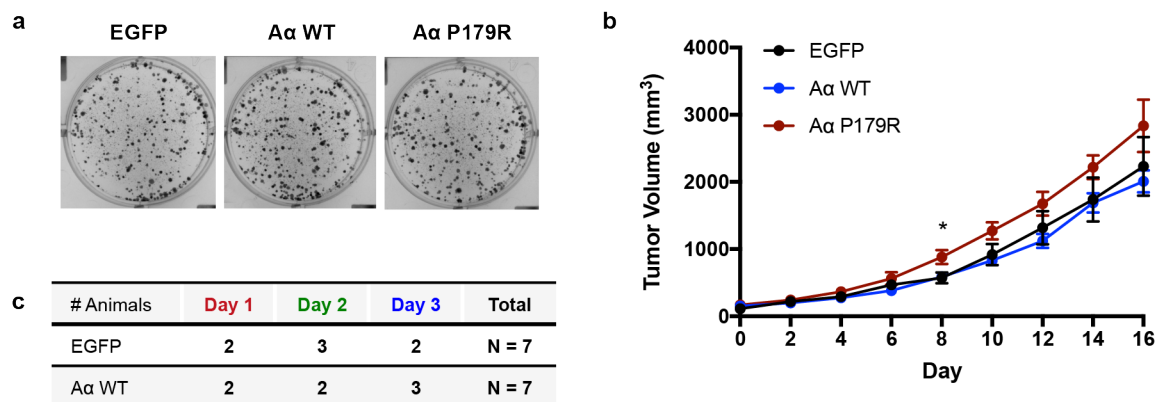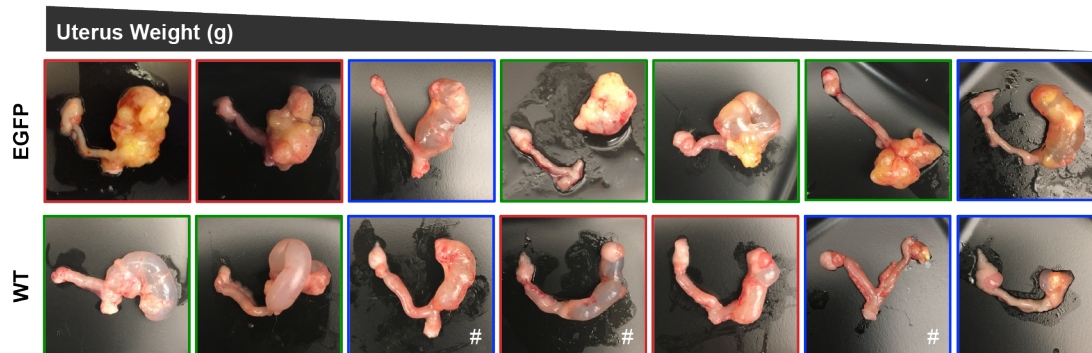

**d**

|       | Macroscopic Evaluation |                            |                            |                             |                      | Microscopic            |
|-------|------------------------|----------------------------|----------------------------|-----------------------------|----------------------|------------------------|
|       | Primary Tumor Presence | Intraperitoneal Metastasis | Retroperitoneal Metastasis | Liver Parenchyma Metastasis | Diaphragm Metastasis | Primary Tumor Presence |
| EGFP  | 7 / 7 (100%)           | 6 / 7 (85.7%)              | 1 / 7 (14.3%)              | 2 / 7 (28.6%)               | 2 / 7 (28.6%)        | 7 / 7 (100%)           |
| Aα WT | 4 / 7 (57.1%)          | 2 / 7 (28.6%)              | 0 / 7                      | 0 / 7                       | 0 / 7                | 4 / 7 (57.1%)          |

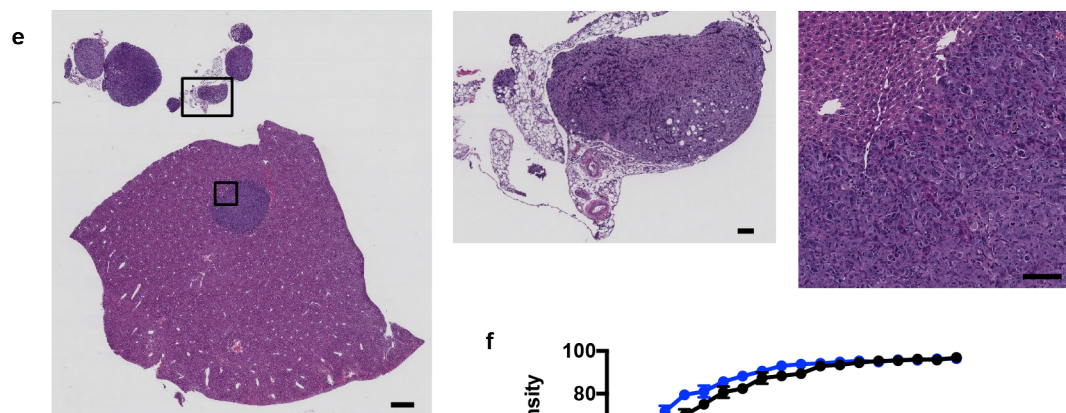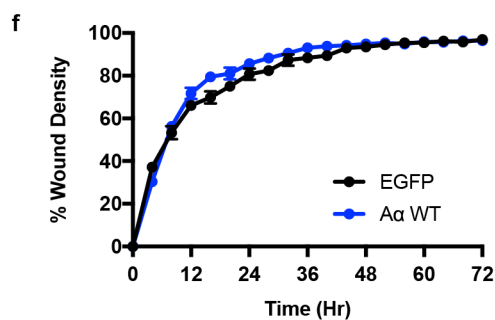

Supplemental Figure 6
