# Supplementary material
Source: PubMed Central journal article supplement (PMC6724736)

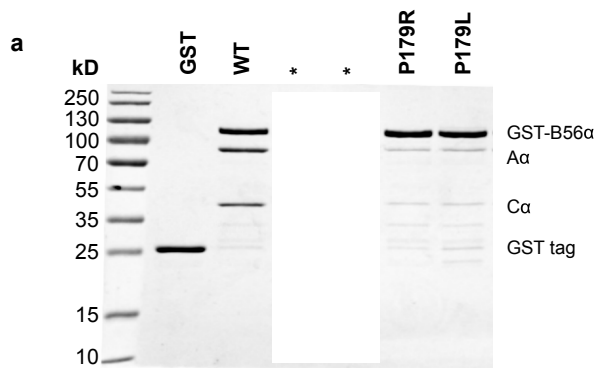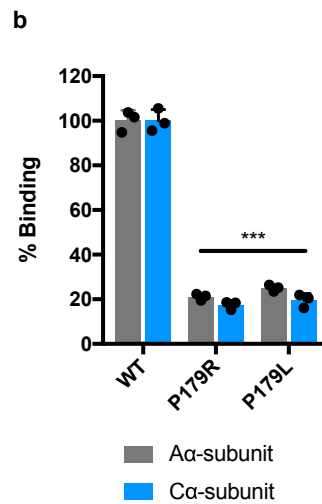

Supplemental Figure 3

Supplement: NIHMS1530492-supplement-4.pdf [file NIHMS1530492-supplement-4.pdf]

**P179 A $\alpha$**

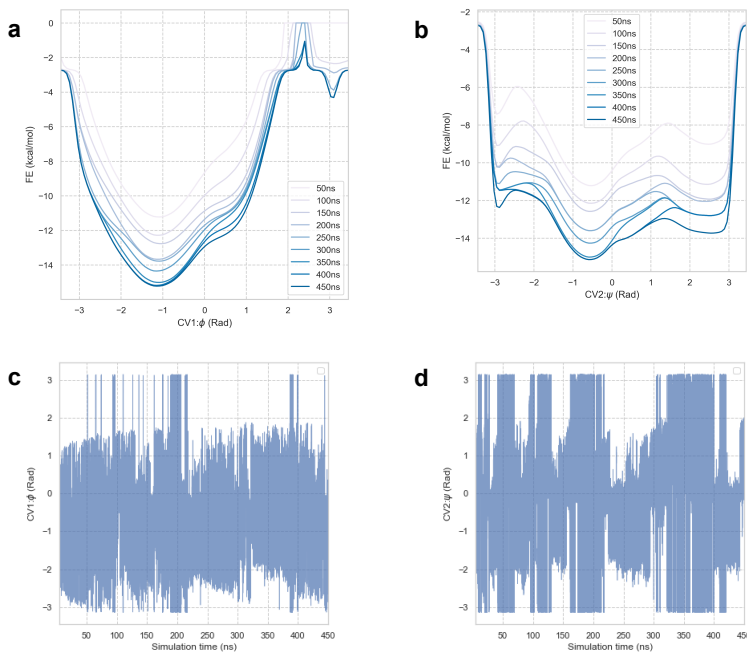

**R179 A $\alpha$**

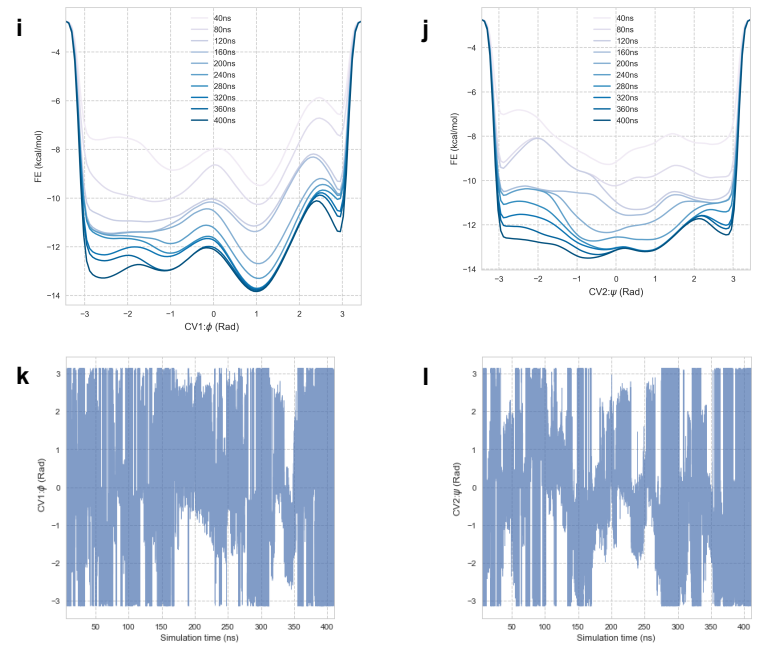

**P179 A $\alpha$  / C complex**

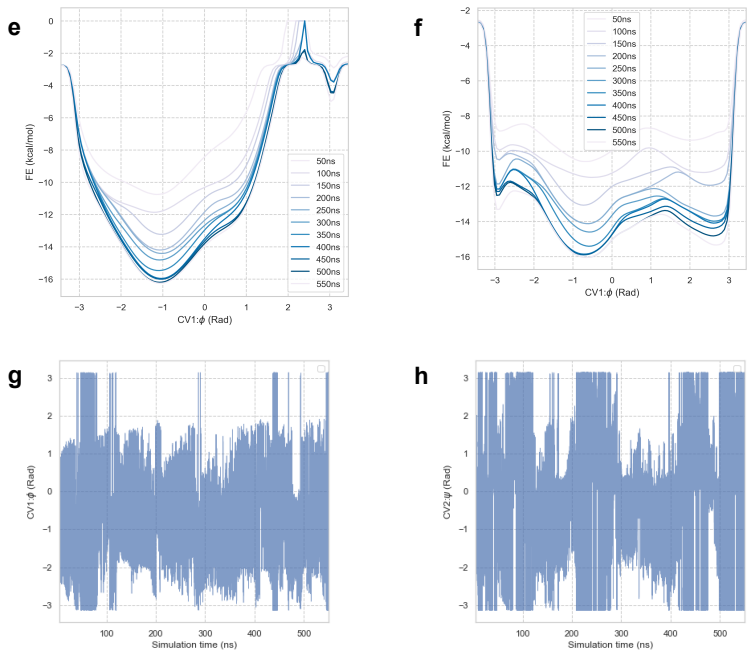

**R179 A $\alpha$  / C complex**

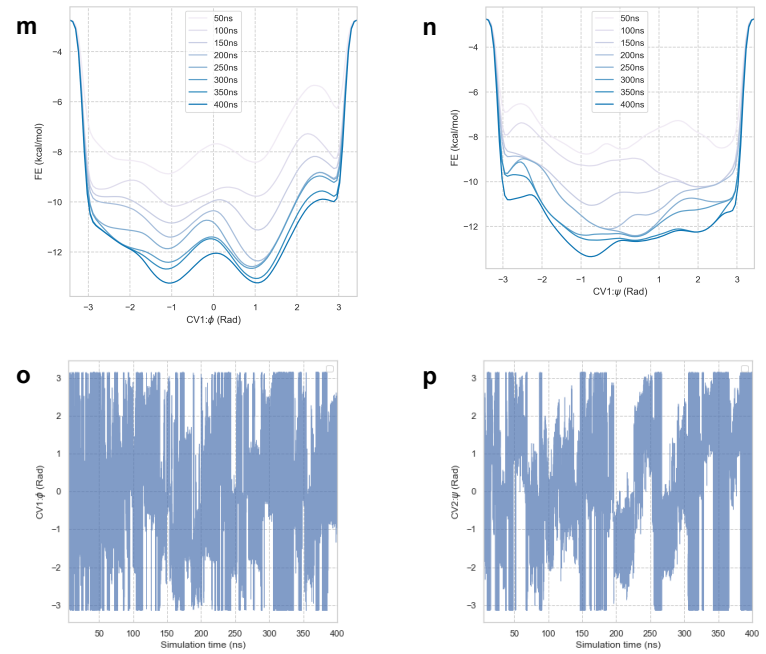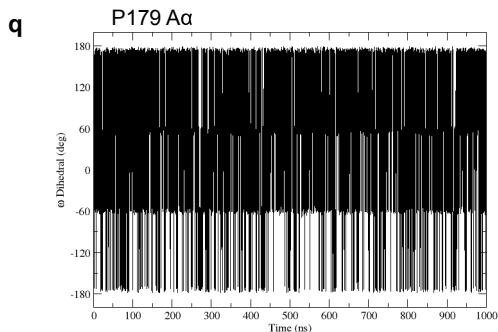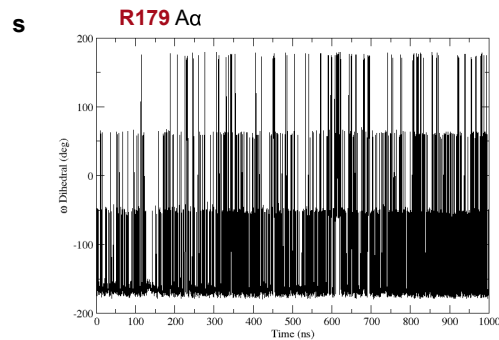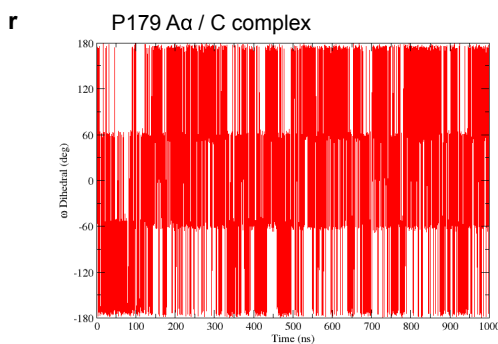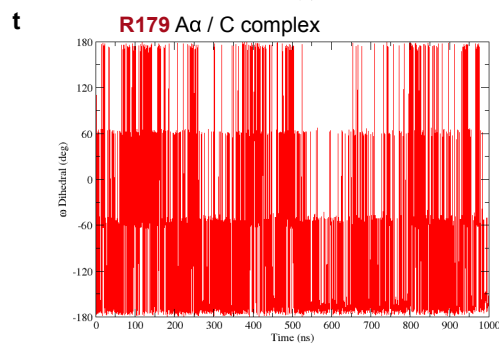

Supplement: NIHMS1530492-supplement-5.pdf [file NIHMS1530492-supplement-5.pdf]

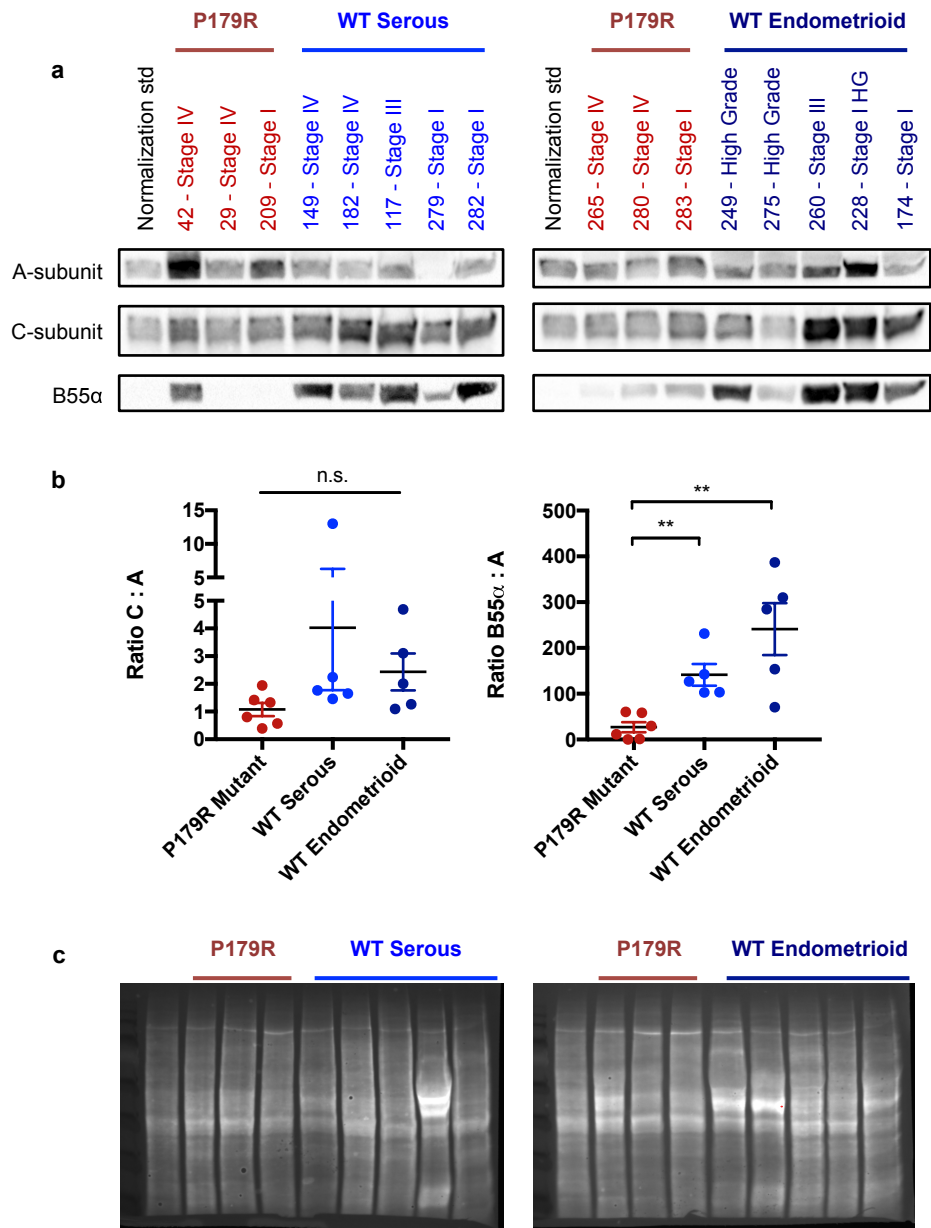

Supplemental Figure 5

Supplement: NIHMS1530492-supplement-6.pdf [file NIHMS1530492-supplement-6.pdf]

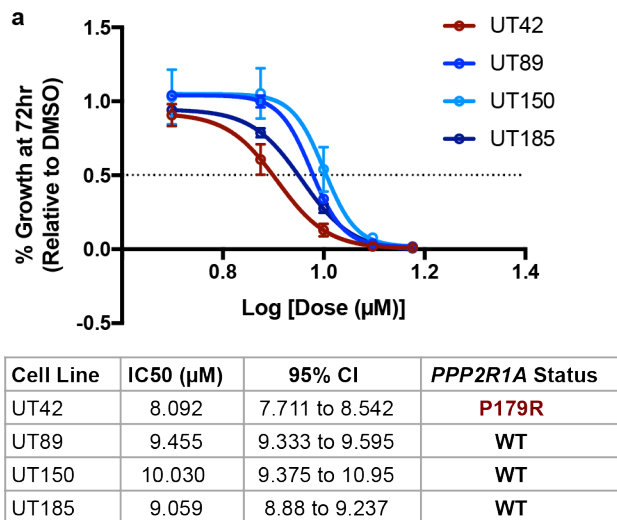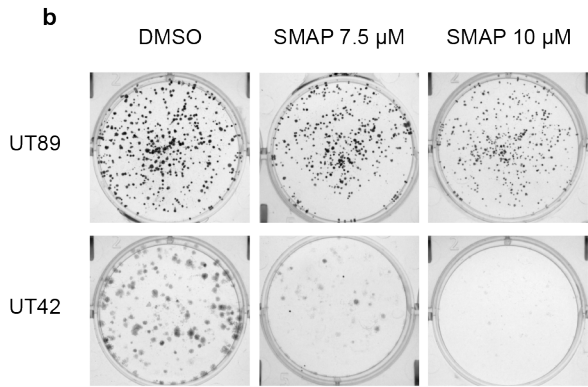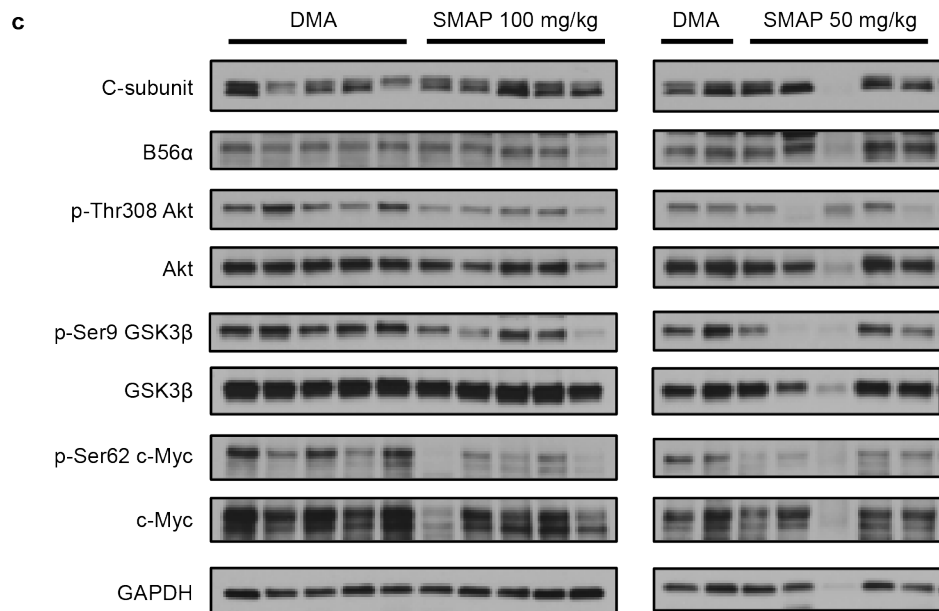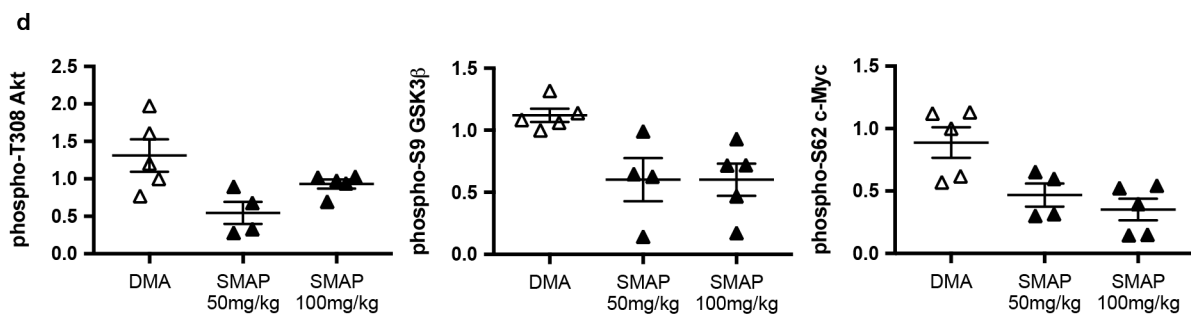

Supplemental Figure 7

Supplement: NIHMS1530492-supplement-8.pdf [file NIHMS1530492-supplement-8.pdf]
